# Supplementary material for: Structures of Brucella ovis leucine-, isoleucine-, valine-, threonine- and alanine-binding protein reveal a conformationally flexible peptide-binding cavity
Source: PubMed Central journal article supplement (PMC11376275; doi:10.1107/s2053230x24007027), 2024-08-23
Supplement: f-80-00193-sup1.pdf [file f-80-00193-sup1.pdf]

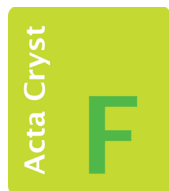

STRUCTURAL BIOLOGY  
COMMUNICATIONS

**Volume 80 (2024)**

**Supporting information for article:**

**Structures of *Brucella ovis* leucine-, isoleucine-, valine-, threonine- and alanine-binding protein reveal a conformationally flexible peptide-binding cavity**

**Graham Chakafana, Reghan Boswell, Andrew Chandler, Krishelle A. Jackson, Senai Neblett, Tyler Postal, Sandhya Subramanian, Jan Abendroth, Peter J. Myler and Oluwatoyin A. Asojo**

Ligands bound in the binding site are crystallization artifacts and usurped from the crystallization solution.

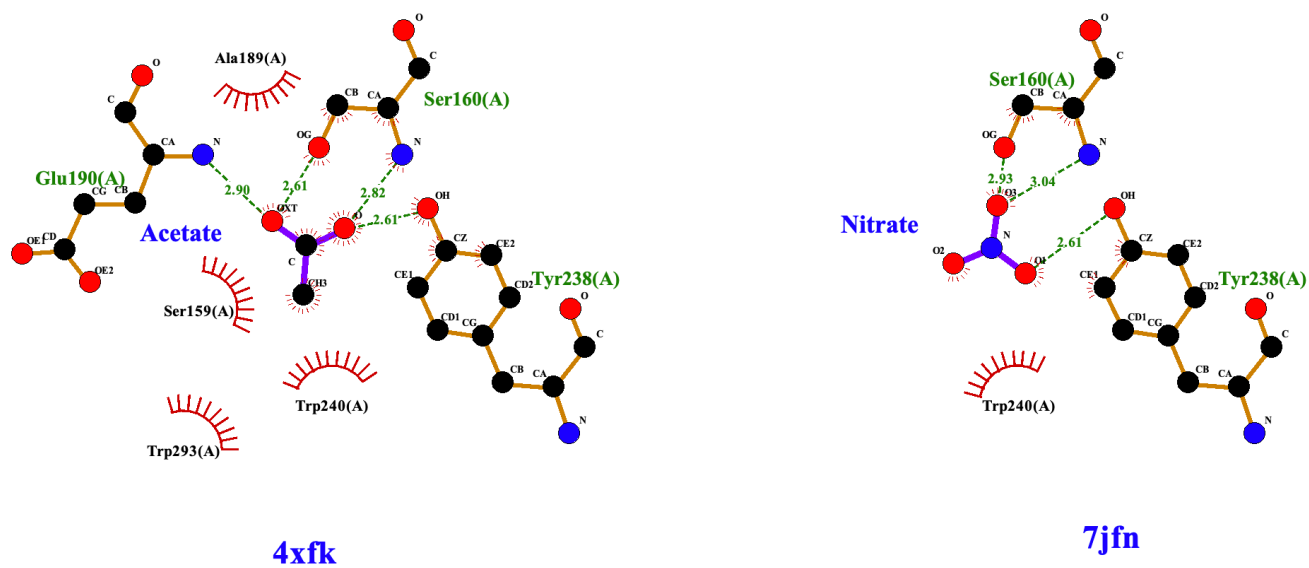

**Figure S1a:** Ligplus map of the interactions of acetate and nitrate atoms in the binding cavities of 4xfk and 7jfn, respectively.

These ligands have well-ordered electron density maps, as shown below.

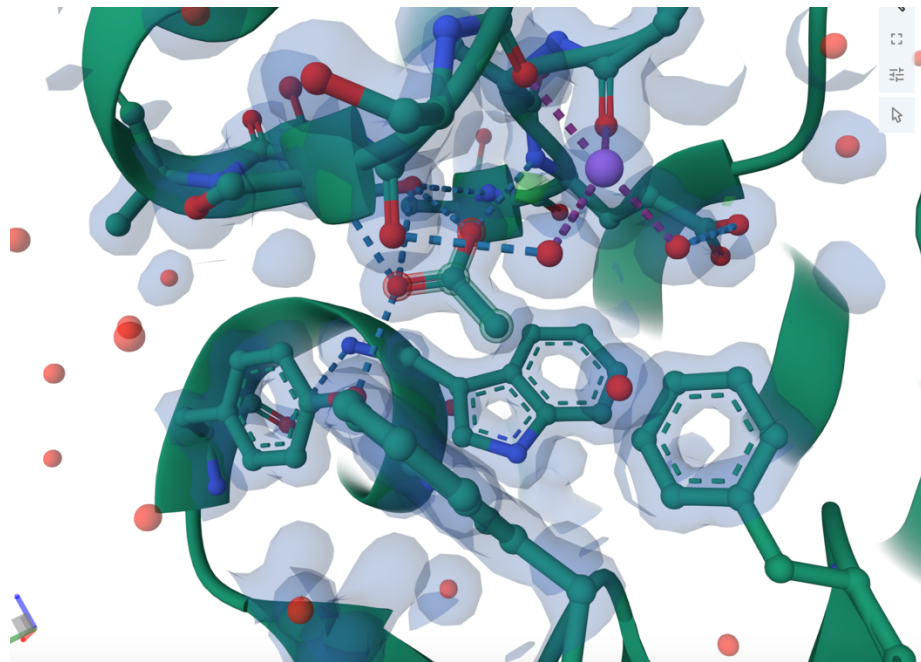

**Figure S1b** Acetate in the binding cavity of PDB entry 4xfk. Image generated with pdb viewer and 2Fo-F map electron density contoured at  $1.6\sigma$

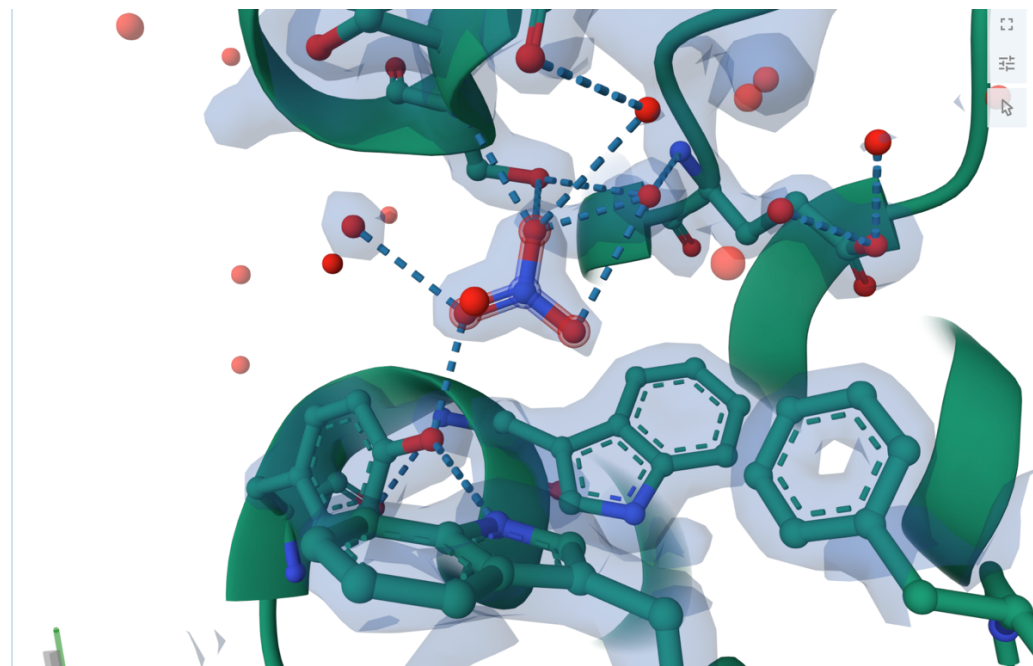

**Figure S1c:** Nitrate in the binding cavity of PDB entry 7jfn. Image generated with pdb viewer and 2Fo-F map electron density contoured at  $1.74\sigma$

## S2. DynDom Analysis

### Domain Pairs

| Property                      | Value     |
|-------------------------------|-----------|
| Fixed Domain<br>( blue )      | 1         |
| Moving Domain<br>( red )      | 2         |
| Rotation Angle<br>(deg)       | 12.0      |
| Translation<br>(A)            | 0.2       |
| Closure<br>(%)                | 99.1      |
| Bending Residues<br>( green ) | 211 - 212 |
|                               | 316 - 322 |
|                               | 326 - 335 |
|                               | 339 - 340 |
|                               | 426 - 429 |
|                               | 448 - 449 |
|                               | 456 - 457 |

[Bending Region Analysis](#)

### Dynamic Contact Graph

Conformer 1 Contact:

**Residue 1**  $\dashrightarrow$  **Residue 2**

Conformer 2 Contact:

**Residue 2**  $\dashrightarrow$  **Residue 1**

Movement classification: Hinge

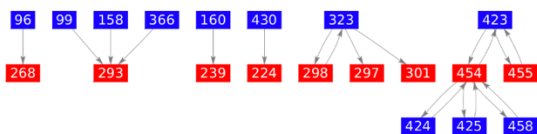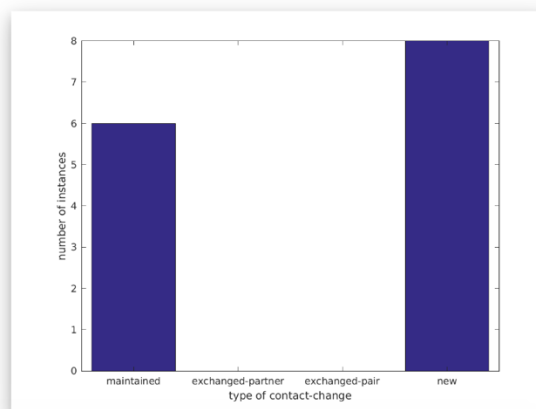

```

4XFK (A) : AEPLKIALVETLSGPQASTGLLYRAAVLYQLGKINEAGGFNGEKIQILEYDNQGGPVGAAADRVKAAIADGAQIIVQGSS:
:
7JFN (A) : AEPLKIALVETLSGPQASTGLLYRAAVLYQLGKINEAGGFNGEKIQILEYDNQGGPVGAAADRVKAAIADGAQIIVQGSS:
:
      211
4XFK (A) : FYHFRFSPNAAIRFKTVAQGMKDKGILGERAYSINQNSWGVVDVENTVVANAKEIGYEVVDKTLHEVNKIQDFSPYVAK:
:
7JFN (A) : FYHFRFSPNAAIRFKTVAQGMKDKGILGERAYSINQNSWGVVDVENTVVANAKEIGYEVVDKTLHEVNKIQDFSPYVAK:
:
      211
      326      339
4XFK (A) : PGNIGNAGAI AEGHIVSTPFNPEANGEASMAFAEDYK KVTGHYPSYVEPAAV FGLQLFGEALKNV KPEGKINTTDIAL:
:
7JFN (A) : PGNIGNAGAI AEGHIVSTPFNPEANGEASMAFAEDYK KVTGHYPSYVEPAAV FGLQLFGEALKNV KPEGKINTTDIAL:
:
      326      339
      448      456
4XFK (A) : GTEYGFLPFKTF TGDESIDPVQESCSMKRPG
:
7JFN (A) : GTEYGFLPFKTF TGDESIDPVQESCSMKRP*
:
      448      456

```

DynDom

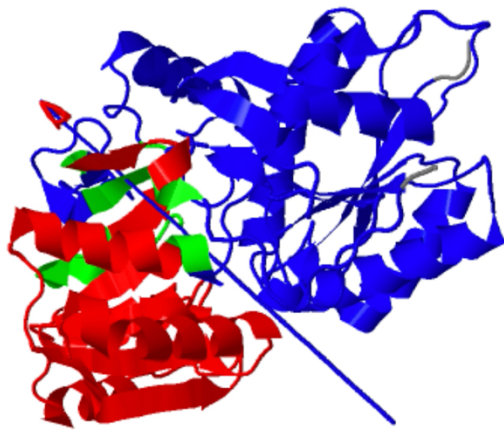

4XFK (A)

DynDom

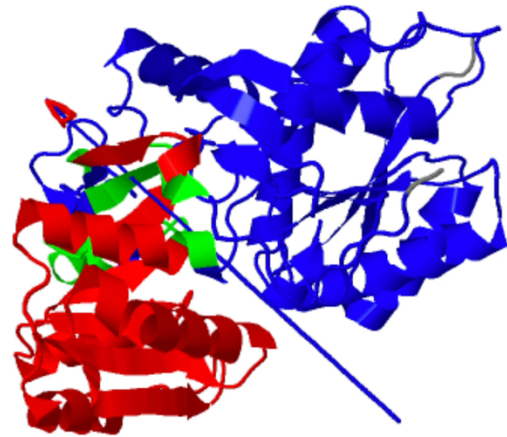

JSmol 7JFN (A)

JSmol

The conformational plasticity is more evident in the movie than in still images.
